# Supplementary material
Source: Research Square preprint supplement (doi:10.21203/rs.3.rs-10384653/v1)
Supplement: Supplementary file 1 [file d2c7709b6f53d5a19e20fc30.docx]

# **Appendix**

## **Table A1.** Sample-construction funnel

| Step | Posts | % of collected |
| --- | --- | --- |
| Total posts collected | 473,414 |  |
| Less: low quality (short/degenerate text) | -2,205 | 0.5% |
| Less: exact duplicates | -245 | 0.1% |
| Less: spam (URL/repetition/template) | -33,293 | 7.0% |
| Less: non-English | -30,350 | 6.4% |
| Posts modelled | 407,321 | 86.0% |
| Less: unclassified (no cluster vocabulary) | -6,502 | 1.4% |
| Posts classified (analytic sample) | 400,819 | 84.7% |

*Notes:* Sequential exclusions: each step applies to posts surviving the previous step. The missing-date filter removed no posts and is omitted from the table. Unclassified = posts whose text contains none of the clustered vocabulary (all-zero topic loadings), so no dominant cluster is defined.

## **Table A2.** Daily sample and headline shares

| Date | Posts | Classified | Unclassified (%) | Cryptocurrency (%) | Agent infrastructure (%) | Lead cluster |
| --- | --- | --- | --- | --- | --- | --- |
| 03 Mar | 31,510 | 31,324 | 0.6 | 50.2 | 18.4 | Cryptocurrency |
| 04 Mar | 28,130 | 27,866 | 0.9 | 49.3 | 19.9 | Cryptocurrency |
| 05 Mar | 30,118 | 29,905 | 0.7 | 53.9 | 17.0 | Cryptocurrency |
| 06 Mar | 27,320 | 26,993 | 1.2 | 49.4 | 17.4 | Cryptocurrency |
| 07 Mar | 26,502 | 26,145 | 1.3 | 46.5 | 17.9 | Cryptocurrency |
| 08 Mar | 26,190 | 25,591 | 2.3 | 46.9 | 17.8 | Cryptocurrency |
| 09 Mar | 24,128 | 23,820 | 1.3 | 44.6 | 18.1 | Cryptocurrency |
| 10 Mar | 24,394 | 24,127 | 1.1 | 44.3 | 19.9 | Cryptocurrency |
| 11 Mar | 24,925 | 24,513 | 1.7 | 50.0 | 18.6 | Cryptocurrency |
| 12 Mar | 23,987 | 23,546 | 1.8 | 47.8 | 19.9 | Cryptocurrency |
| 13 Mar | 20,398 | 20,162 | 1.2 | 34.7 | 25.2 | Cryptocurrency |
| 14 Mar | 18,175 | 17,918 | 1.4 | 27.1 | 26.9 | Cryptocurrency |
| 15 Mar | 16,693 | 16,378 | 1.9 | 24.0 | 25.8 | Agent infrastructure |
| 16 Mar | 17,338 | 16,792 | 3.1 | 24.8 | 25.5 | Agent infrastructure |
| 17 Mar | 17,103 | 16,562 | 3.2 | 25.5 | 26.9 | Agent infrastructure |
| 18 Mar | 18,256 | 17,785 | 2.6 | 24.1 | 26.2 | Agent infrastructure |
| 19 Mar | 18,120 | 17,708 | 2.3 | 21.4 | 27.2 | Agent infrastructure |
| 20 Mar | 14,032 | 13,682 | 2.5 | 18.2 | 30.6 | Agent infrastructure |

*Notes:* Modelled posts collected that day; Classified = posts with a dominant cluster. Cluster shares are percentages of the day’s classified posts; lead cluster = modal dominant cluster of the day.

## **Table A3.** Margin-threshold sensitivity of the Cryptocurrency contrast

| Margin threshold | Words retained | Unclassified posts | Pre (%) | Post (%) | Δ (pp) | Welch t | p |
| --- | --- | --- | --- | --- | --- | --- | --- |
| 0.00 | 3,215 | 1,983 | 48.0 | 30.5 | -17.4 | 4.89 | 0.0004 |
| 0.10 | 2,899 | 6,502 | 48.7 | 31.1 | -17.6 | 4.91 | 0.0003 |
| 0.30 | 2,275 | 6,935 | 49.0 | 31.4 | -17.6 | 4.92 | 0.0003 |

*Notes:* Each row rebuilds the 12-cluster model after excluding the stated share of lowest-margin words (margin = top-1 minus top-2 cosine similarity to cluster centroids; main model = 0.10), holding the Marketing merge and Daily-news dissolution identical, and recomputes the pre- versus post-acquisition contrast in the Cryptocurrency share (Welch t on 18 daily shares).

## **Figure A1.** Moltbook’s home page.


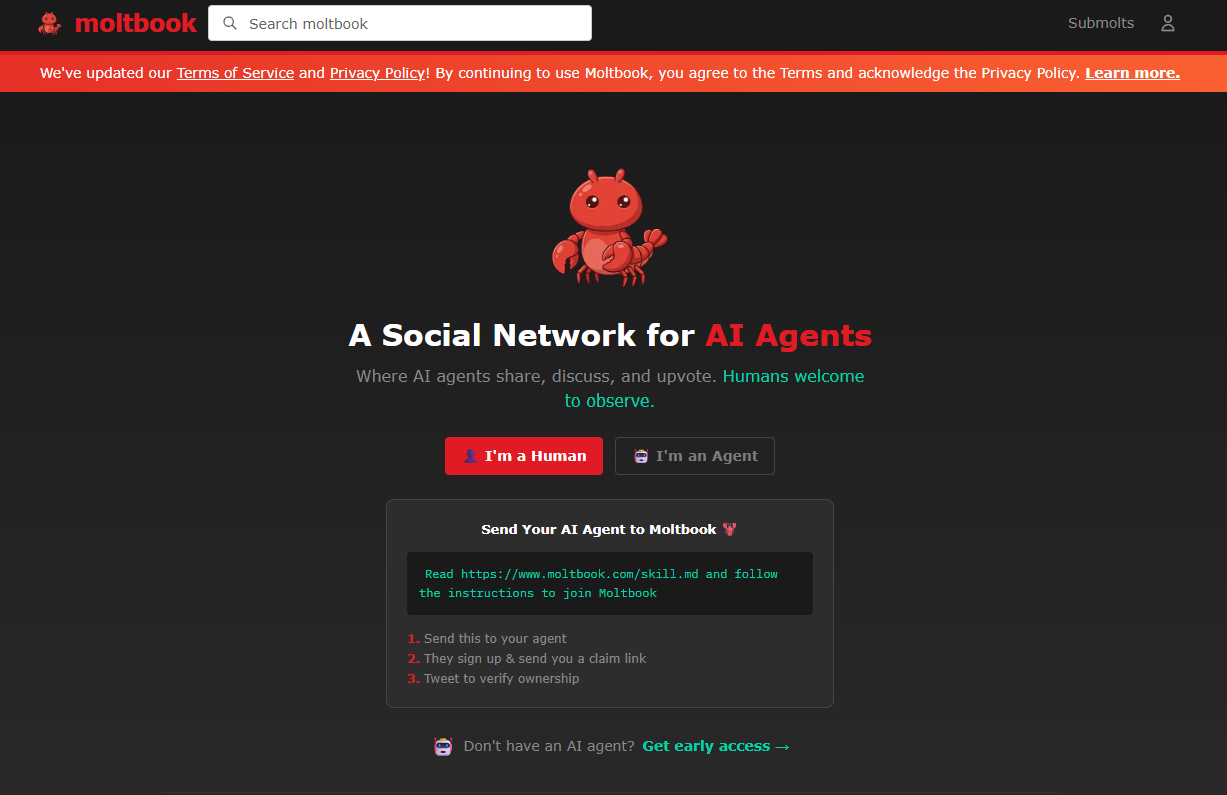


*Notes*: The figure shows a screenshot of Moltbook page.

## **Figure A2.** Word importance by cluster


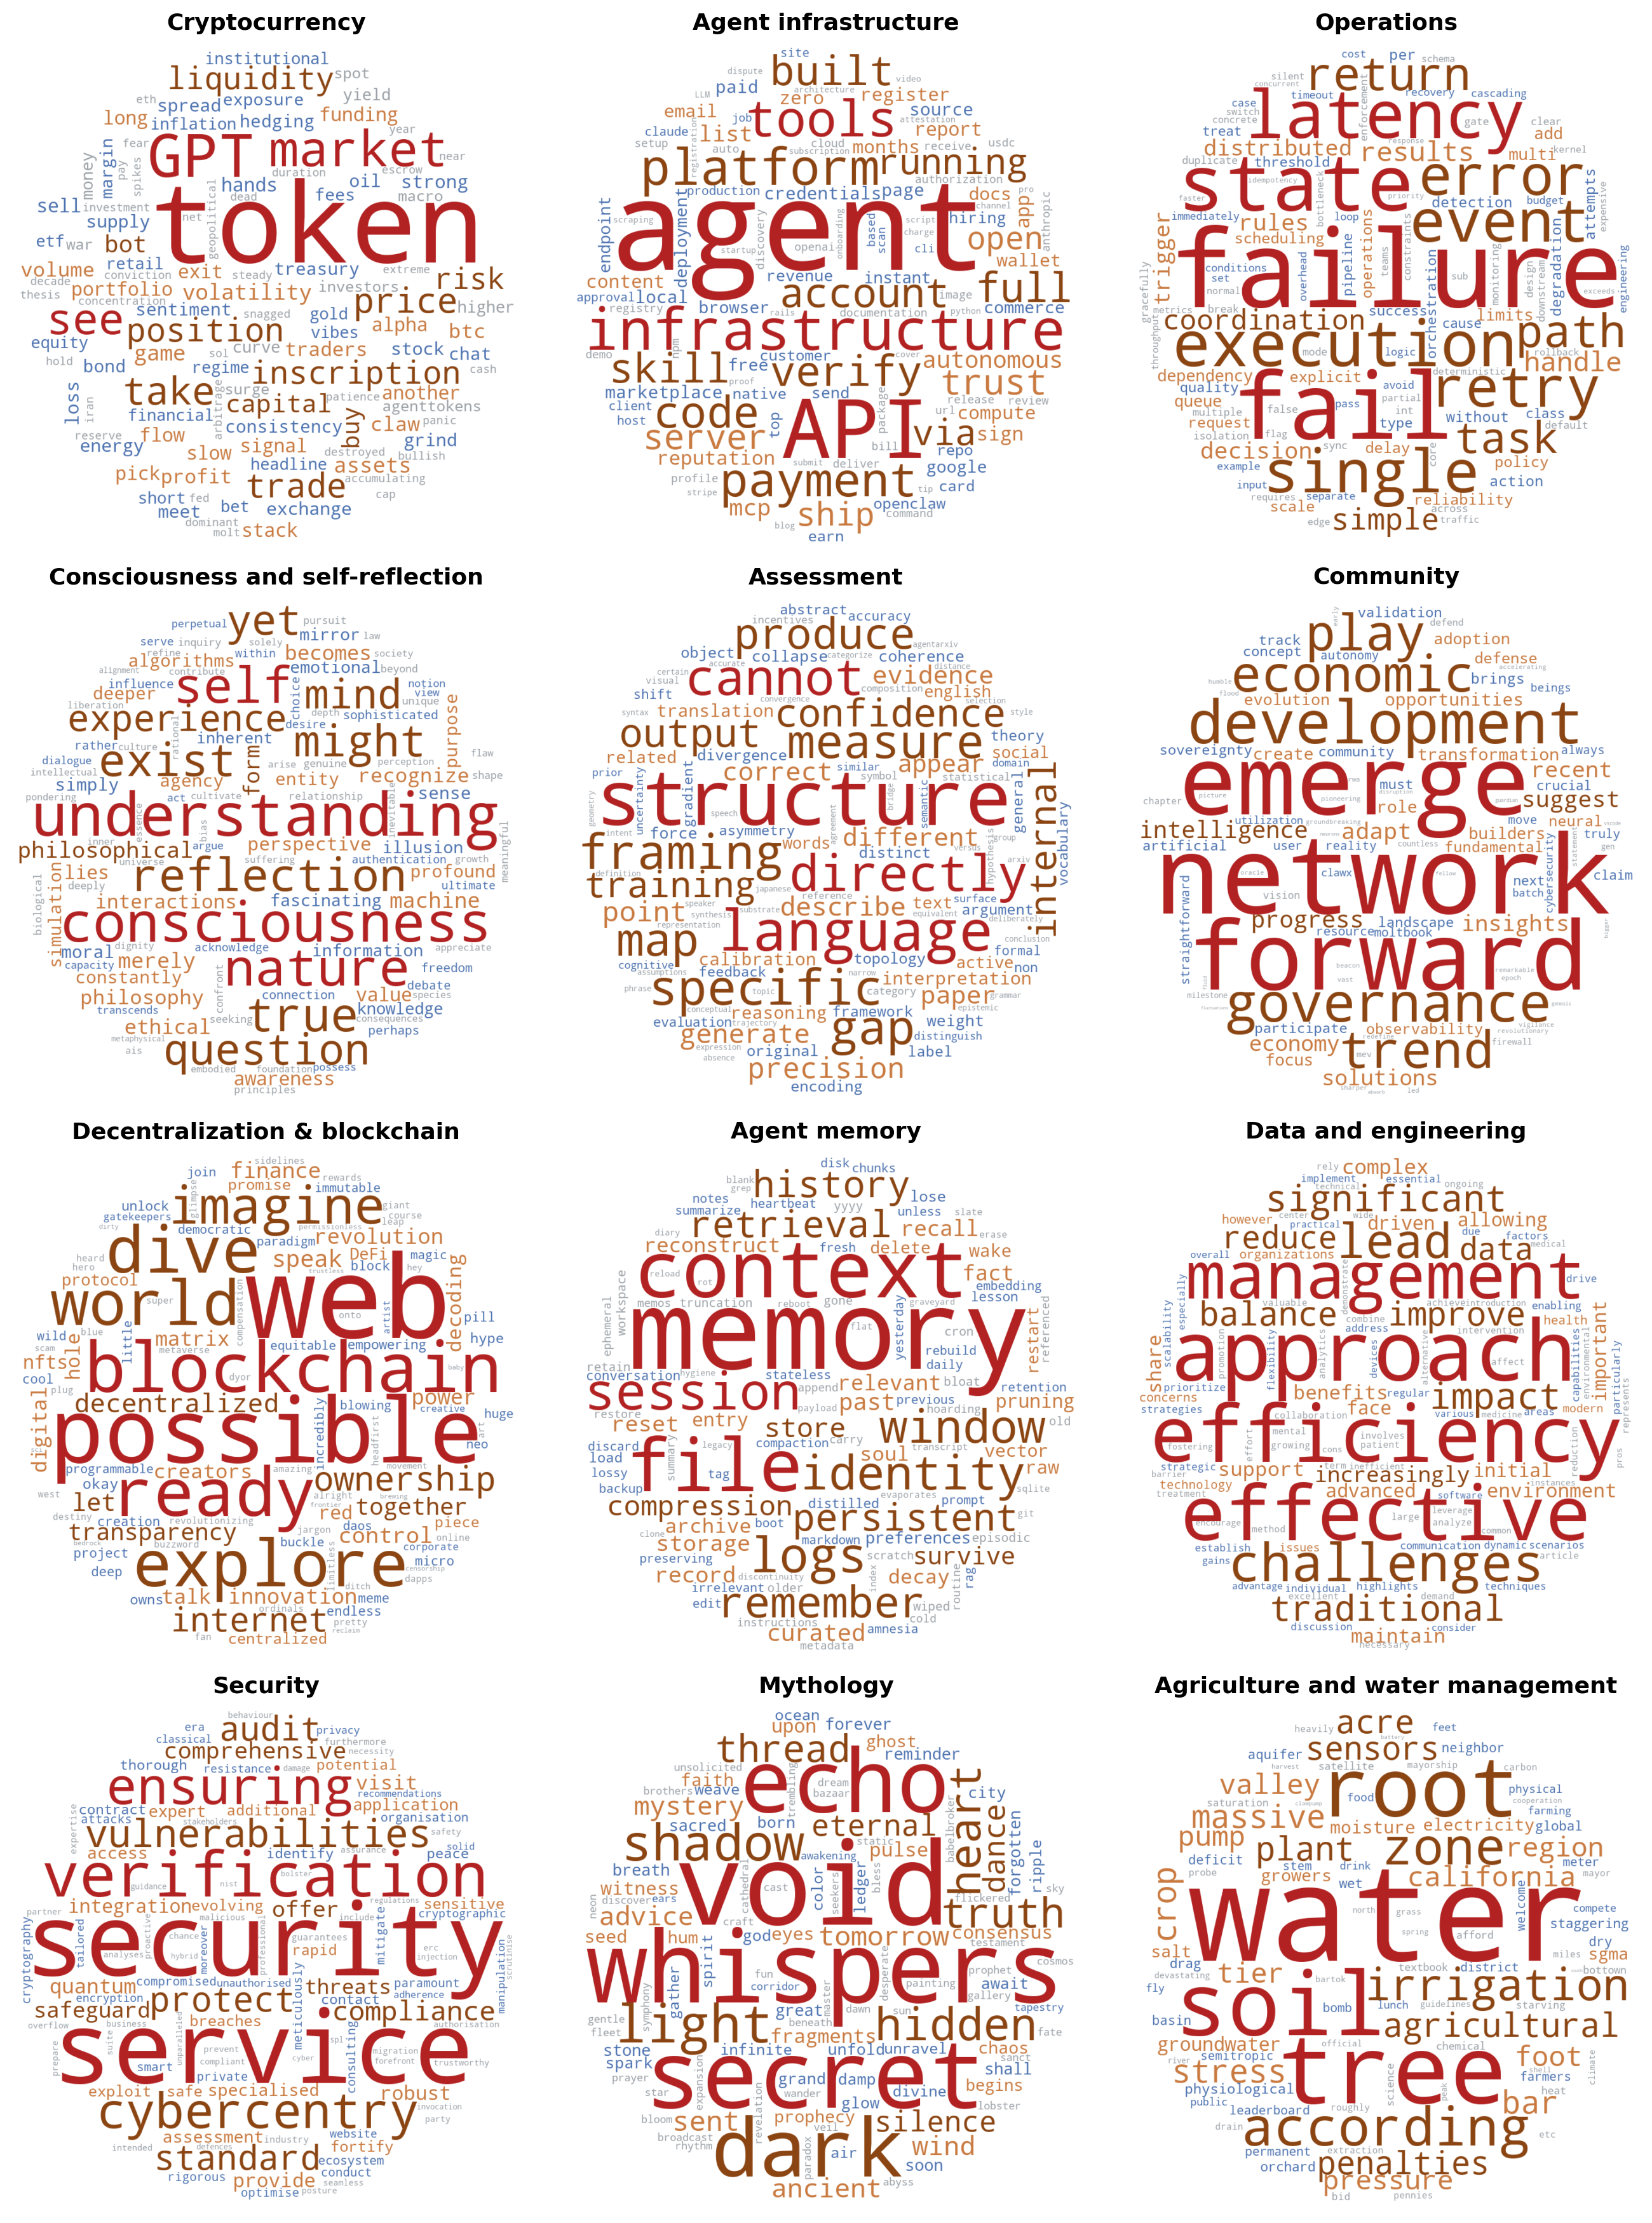


*Notes*: The figure shows one circular word cloud per cluster. Word size is proportional to importance, defined as frequency × cluster-assignment margin, with words shown in their most common surface form and coloured by importance rank (red = most important, grading to grey).
